# Supplementary material
Source: publisher figshare collection journal article supplement (https://acs.figshare.com/ndownloader/files/4172944)

# **Stimulus-responsive Controlled Release System by Covalent Immobilization of an Enzyme into Mesoporous Silica Nanoparticles**

Jessica Méndez, Alina Monteagudo, and Kai Griebenow\*

Department of Chemistry, University of Puerto Rico, Río Piedras Campus, PO Box 23346, San  
Juan, PR 00931-3346, USA

SUPPORTING INFORMATION

**Scanning Electron Microscopy (SEM).** SEM was performed using a JEOL 5800LV scanning electron microscope at 20 kV. The samples were coated with gold (200-500 Å) using a Denton Vacuum DV-502A.

**Figure S1.** SEM micrographs of (A) MSN, (B) MSN-SH, and (C) MSN-CA.

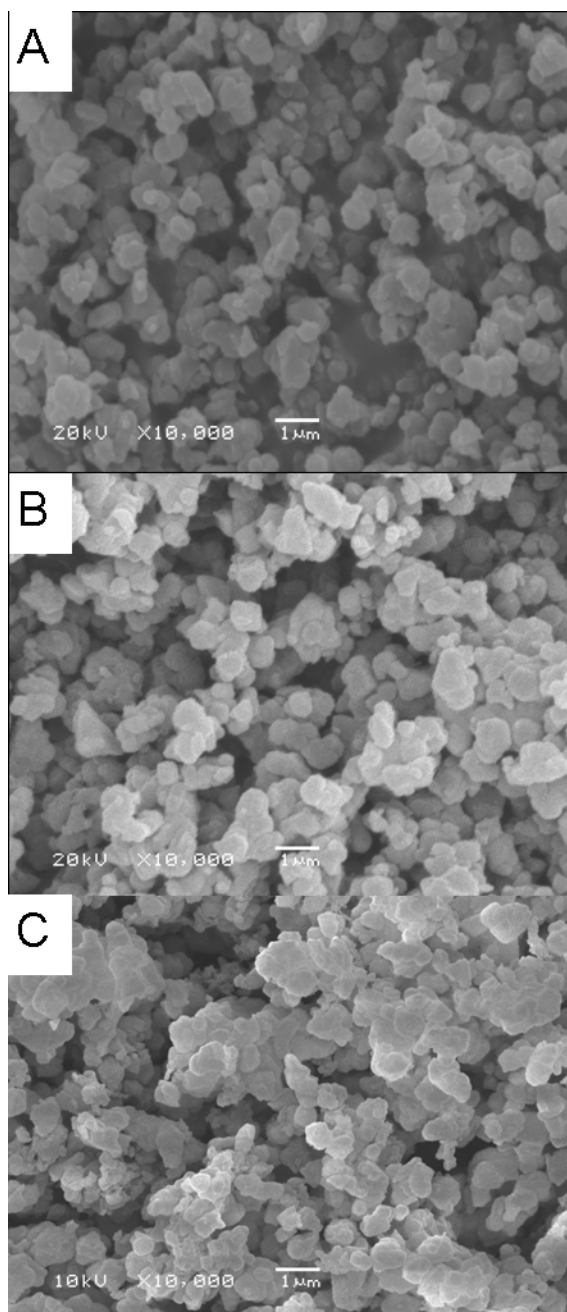

**Figure S2.** CA-SPDP bioconjugate residual activity at different levels of modification

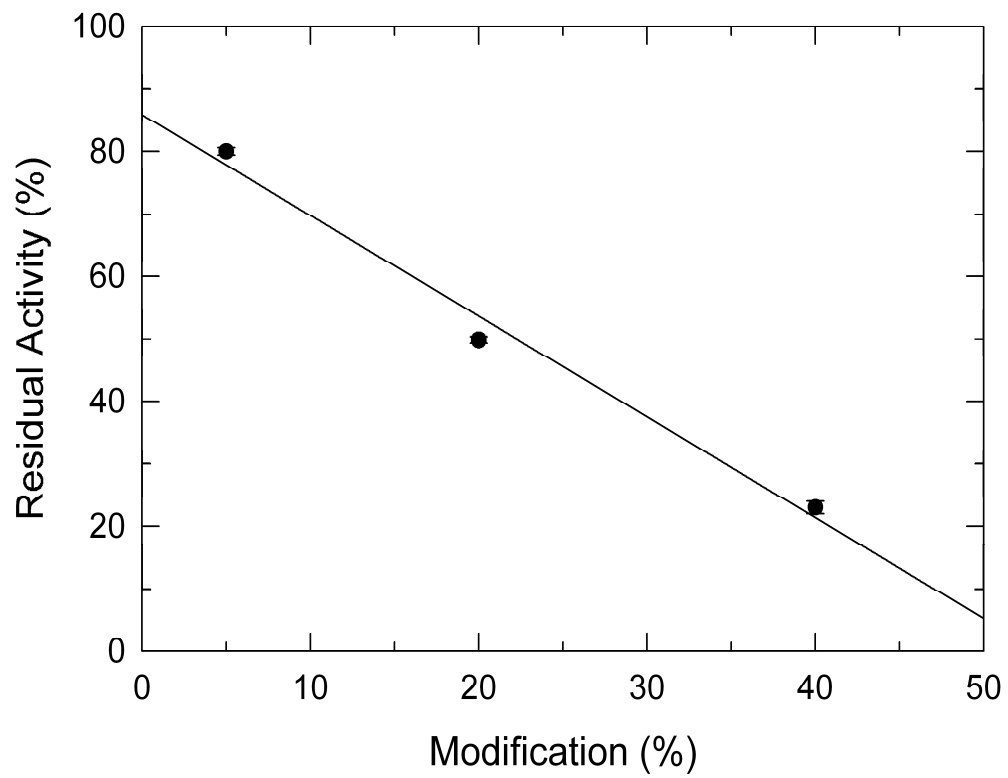

Supplement: Supplementary file 1 [file 4172944]
